# Supplementary material for: Structure–function analyses reveal that a glucuronoyl esterase from Teredinibacter turnerae interacts with carbohydrates and aromatic compounds
Source: PubMed Central journal article supplement (PMC6484129; doi:10.1074/jbc.ra119.007831), 2019-02-27
Supplement: supp_RA119.007831_143500_1_supp_289401_pn8m57.pdf [file supp_RA119.007831_143500_1_supp_289401_pn8m57.pdf]

## SUPPORTING INFORMATION

**Structure-function analyses reveal that a glucuronoyl esterase from *Teredinibacter turnerae* interacts with carbohydrates and aromatic compounds**

**Authors:** Jenny Arnlind Bååth, Scott Mazurkewich, Jens-Christian Navarro Poulsen, Lisbeth Olsson, Leila Lo Leggio and Johan Larsbrink

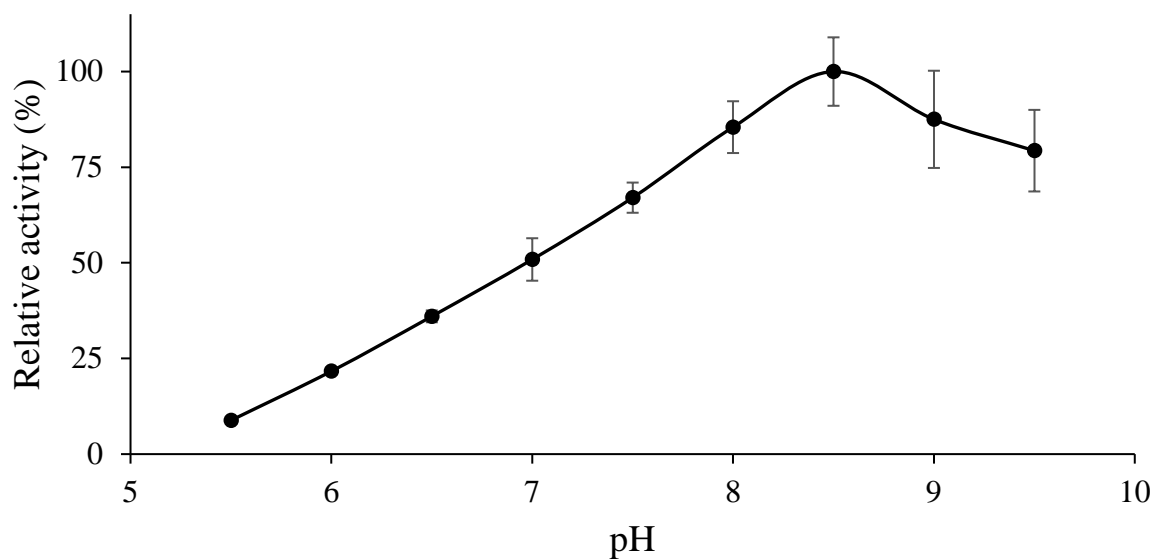

**Figure S1. Effect of pH on hydrolysis of BnzGlcA by *TtCE15A*.** The pH-dependence was analyzed with 2 mM BnzGlcA as substrate in a three-component buffer containing 25 mM acetic acid, 25 mM MES, and 50 mM Tris-HCl, covering pH 4.5-9.5. Measurements at higher pHs were not possible due to substrate instability. Mean values are plotted with standard errors of the mean generated from duplicate measurements.

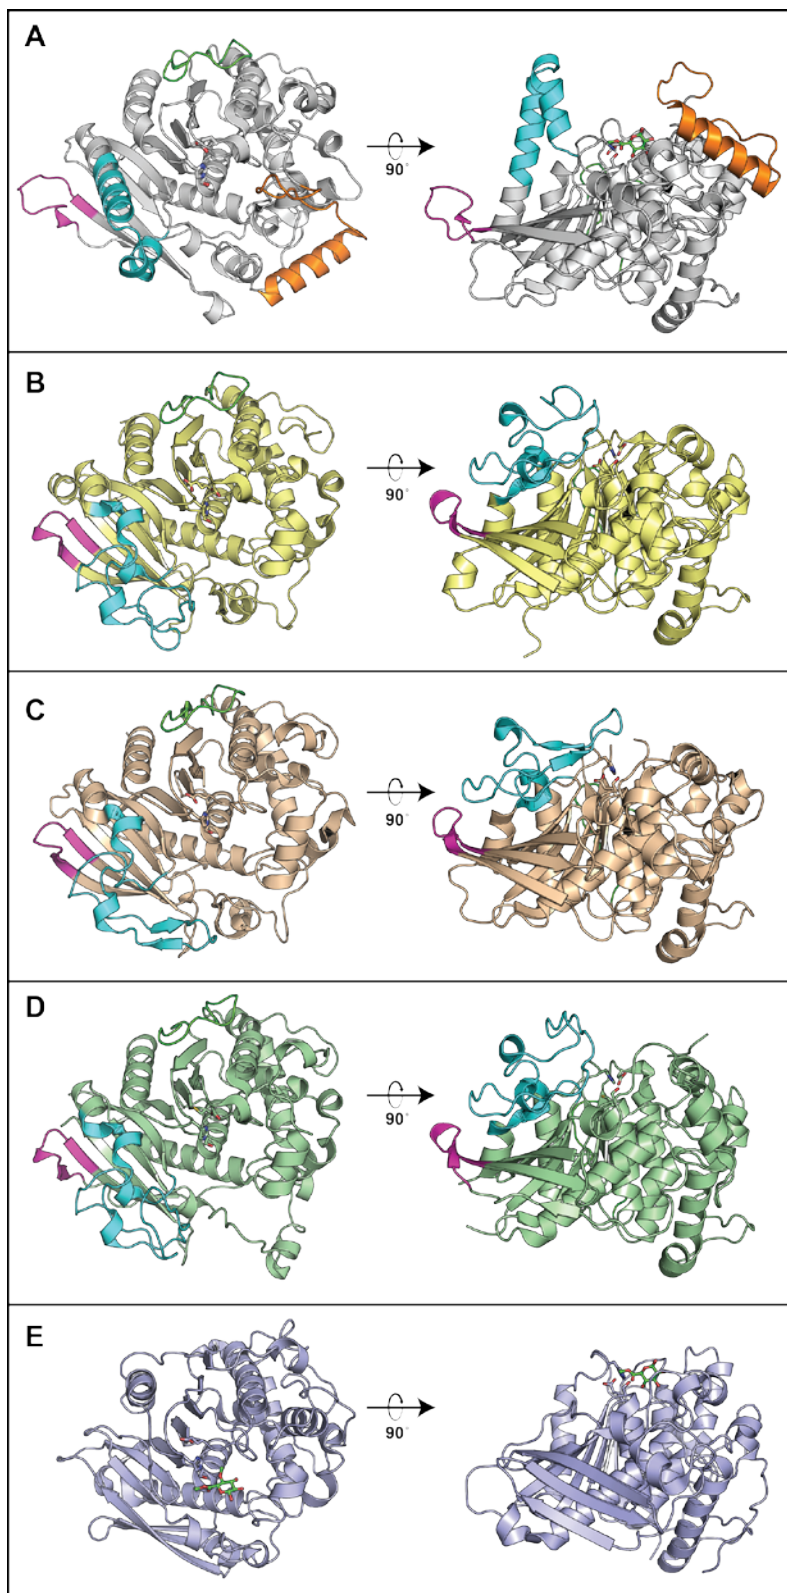

**Figure S2. Comparison of structurally determined CE15 members.** The overall structure of *Ti*CE15A (A, PDB: 6hsw), *Ot*CE15A from *Opitutus terrae* (B, PDB: 6gs0), *Su*CE15A from *Solibacter usitatus* (C, PDB: 6gry), MZ0003 from a marine metagenome analysis (D, PDB: 6ehn), and *St*GE2 from *Thermothelomyces thermophila* (E, PDB: 4g4j). The catalytic triad in each enzyme is shown as sticks and the methyl ester of 4-*O*-methyl glucuronate is shown as green sticks with the *St*GE2 structure in panel E. The inserted regions in the bacterial enzymes, relative to their fungal counterparts, regions 1, 2, and 3, are colored magenta, cyan, and green, respectively. Region N only found in *Ti*CE15A is coloured orange.

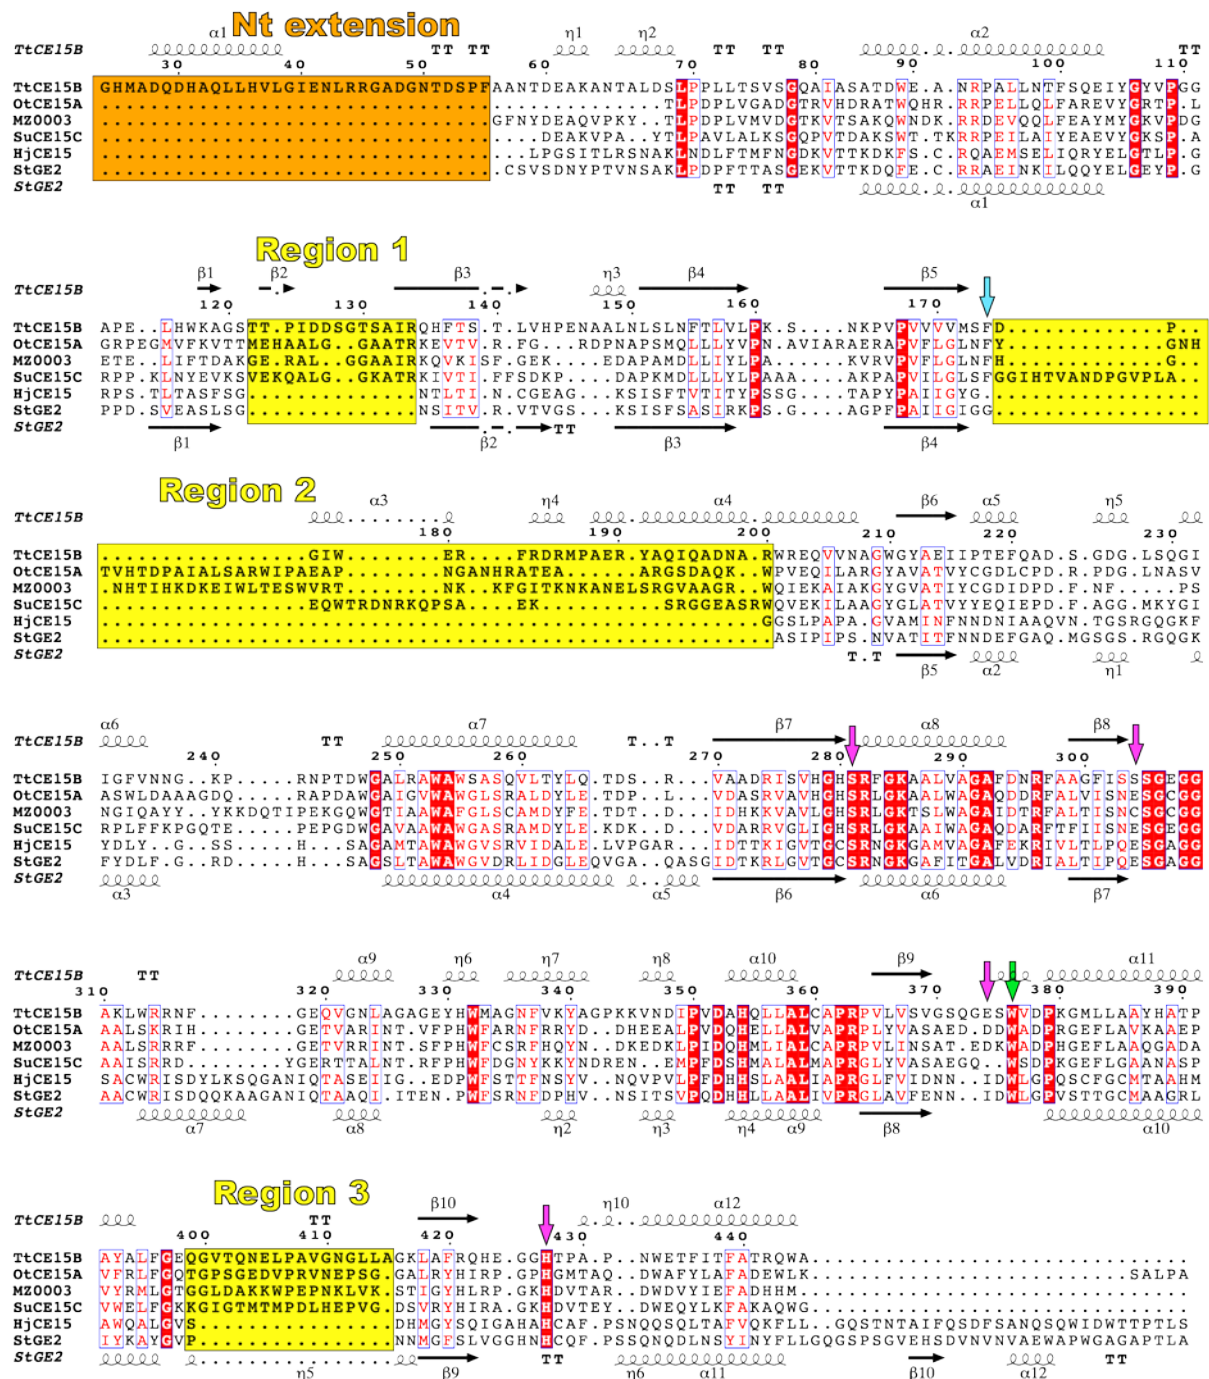

**Figure S3. Structure-based sequence alignment of all structurally characterized glucuronoyl esterases.** Similar residues are written in red text while conserved residues are written in white text over a red background. The inserted regions 1, 2 and 3 found in the bacterial structures relative to the fungal counterparts are highlighted in yellow. The N-terminal region (Nt extension; RegN) in *Tt*CE15A is highlighted in orange. The residues of the conserved catalytic triad, including the canonical and non-canonical acidic residues, are indicated with magenta arrows. The suggested “lignin-binding” Phe is indicated with a cyan arrow and the proposed “carbohydrate-binding” Trp with a green arrow.

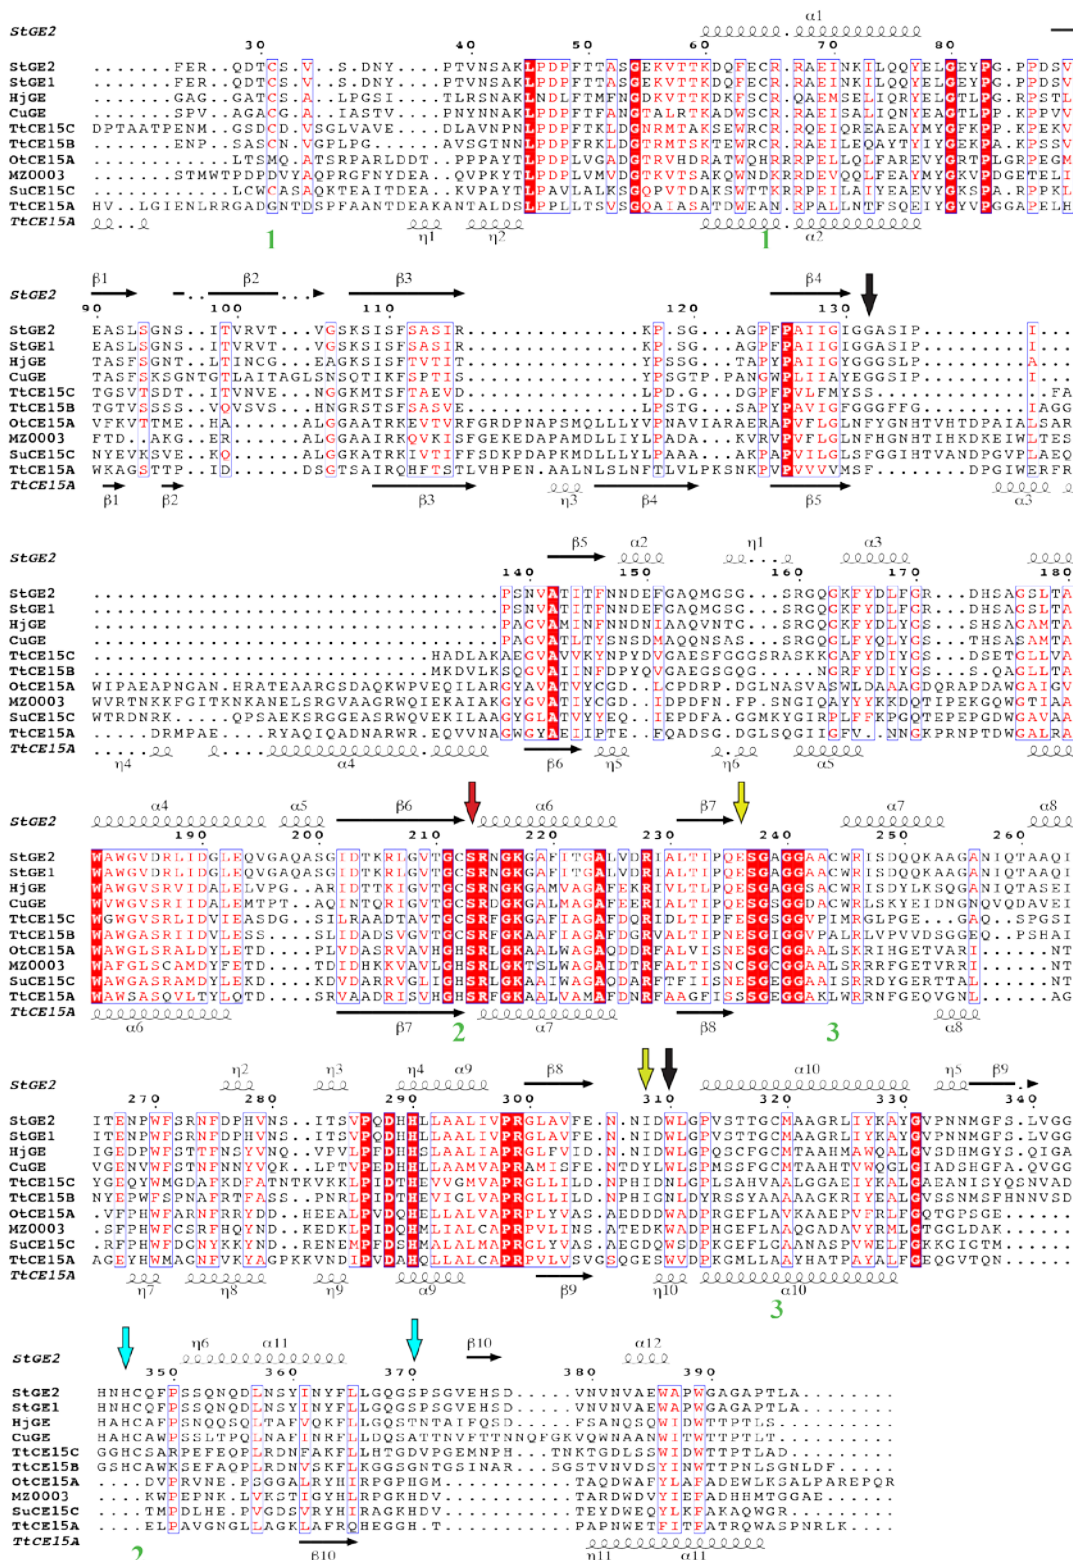

**Figure S4.** Multiple sequence alignment of selected characterized bacterial and fungal CE15 members, including the three CE15 enzymes encoded by *T. turnerae* (*TrCE15A*, *TrCE15B* and *TrCE15C*). Similar residues are written in red text while conserved residues are written in white text over a red background. Arrows indicate significant residues in the active site. The conserved catalytic serine is indicated with a red arrow, histidine with a cyan arrow and the canonical or non-canonical glutamate/aspartate with a yellow arrow. Both *TrCE15B* and *TrCE15C* have the canonical glutamate and *TrCE15C* additionally have an aspartate residue at the non-canonical position. Notably, the histidine of *TrCE15B* and *TrCE15C* align with the histidine of the fungal CE15 enzymes, whereas the histidine of the other bacterial enzymes align at a later point. The suggested “lignin and carbohydrate binding” phenylalanine and tryptophan residues are indicated with black arrows. Neither of these residues are conserved in *TrCE15B* or *TrCE15C*. Three disulfide bridges, conserved in the fungal GEs are labeled with green numbers. Two of these bridges are also conserved in *TrCE15B* and *TrCE15C*, but not in the other aligned bacterial sequences.

**Table S1. Sequence identity (%) between *Tt*CE15A, the other CE15 enzymes encoded by *T. turnerae*, and previously characterized CE15 enzymes.** Sequence identity (%) and query coverage (% , in brackets) were calculated using BLAST (<https://blast.ncbi.nlm.nih.gov/Blast.cgi>) with *Tt*CE15A as query sequence. *Tt*CE15A was aligned against *Tt*CE15B and C, all characterized bacterial CE15 enzymes, as well as the two structurally determined fungal CE15 enzymes.

| Origin             | Enzyme           | % Identity (% query coverage) |
|--------------------|------------------|-------------------------------|
| <i>T. turnerae</i> | <i>Tt</i> CE15B  | 37 (57)                       |
|                    | <i>Tt</i> CE15C  | 25 (71)                       |
| Bacterial          | <i>Ot</i> CE15A* | 34 (88)                       |
|                    | <i>Ot</i> CE15B  | 32 (35)                       |
|                    | <i>Ot</i> CE15C  | 34 (96)                       |
|                    | <i>Ot</i> CE15D  | 41 (95)                       |
|                    | <i>Sl</i> CE15A  | 34 (94)                       |
|                    | <i>Sl</i> CE15B  | 39 (92)                       |
|                    | <i>Sl</i> CE15C  | 41 (99)                       |
|                    | <i>Su</i> CE15A  | 34 (91)                       |
|                    | <i>Su</i> CE15B  | 43 (99)                       |
|                    | <i>Su</i> CE15C* | 33 (92)                       |
|                    | MZ0003*          | 30 (92)                       |
| Fungal             | <i>Cip2</i> *    | 34 (37)                       |
|                    | <i>StGE2</i> *   | 32 (28)                       |

\*Structurally determined CE15 enzymes

**Table S2. Primers used for cloning and mutagenesis of *TtCE15A*.**

| Construct    | Primer     | 5'-3' sequence                                   |
|--------------|------------|--------------------------------------------------|
| <i>WT</i>    | TtCE15Af   | ACTTCCAGGGCCATATGGCAGATCAGGATCACGCACAGCTACTTCAC  |
|              | TtCE15Ar   | GGTGGTGGTGCTCGAGTTATGCCATTGGCGCGTTGCAAAGGTGATAAA |
| <i>S281A</i> | TtA-S281Af | CCACGCACGCTTTGGCAAGGCGGCACTGG                    |
|              | TtA-S281Ar | GCCAAAGCGTGCGTGGCCGTGGACACTGA                    |
| <i>F174A</i> | TtA-F174Af | ATGAGCGCCGACCCTGGCATTGTTGGGAGCGT                 |
|              | TtA-F174Ar | GCCAGGGTCGGCGCTCATCACTACTACCACCGGT               |
| <i>F174D</i> | TtA-F174Df | ATGAGCGATGACCCTGGCATTGTTGGGAGCGTTTC              |
|              | TtA-F174Dr | CAGGGTCATCGCTCATCACTACTACCACCGGTACG              |
| <i>W376A</i> | TtA-W376Af | AGAGTGCAGTCGATCCGAAAGGTATGCTG                    |
|              | TtA-W376Ar | ATCGACTGCACTCTCGCCCTGGCTGCC                      |
| <i>W376D</i> | TtA-W376Df | GAGAGTGACGTCGATCCGAAAGGTATGCT                    |
|              | TtA-W376Dr | ATCGACGTCACTCTCGCCCTGGCTGC                       |
| <i>E374A</i> | TtA-E374Af | GGGCGCGAGTTGGGTCGATCCGAAAGGTATGCTGC              |
|              | TtA-E374Ar | AACTCGCGCCCTGGCTGCCGACGCTCA                      |
| <i>S304E</i> | TtA-S304Ef | CAGCGAGTCCGGCGAAGGCGGTGCAAAG                     |
|              | TtA-S304Er | CCGGACTCGCTGATAAATCCCGCGGCGAATCG                 |

**Table S3. Table of crystallographic statistics.**

| <i>TiCE15A-SeMet</i>                                |                        |
|-----------------------------------------------------|------------------------|
| Data Collection                                     |                        |
| Date                                                | July 26, 2017          |
| Source                                              | P11 at Petra III       |
| Wavelength (Å)                                      | 0.975                  |
| Space group                                         | P3 <sub>1</sub> 21     |
| Cell dimensions                                     |                        |
| <i>a</i> , <i>b</i> , <i>c</i> (Å)                  | 121.17, 121.17, 198.20 |
| $\alpha$ , $\beta$ , $\gamma$ (°)                   | 90, 90, 120            |
| No. of measured reflections                         | 1868254 (177660)       |
| No. of independent reflections                      | 92246 (9051)           |
| Resolution (Å)                                      | 2.147                  |
| <i>R</i> <sub>merge</sub> (%)                       | 5.987 (52.44)          |
| CC <sub>1/2</sub>                                   | 0.998 (0.609)          |
| Mean <i>I</i> / $\sigma$ <i>I</i>                   | 12.49 (1.32)           |
| Completeness                                        | 99.79 (98.96)          |
| Redundancy                                          | 20.3 (19.6)            |
| Refinement                                          |                        |
| <i>R</i> <sub>work</sub> / <i>R</i> <sub>free</sub> | 0.164/0.208            |
| No. atoms                                           |                        |
| Protein                                             | 9703                   |
| Ligand/ions                                         | 199                    |
| Water                                               | 821                    |
| B-factors                                           |                        |
| Protein                                             | 45.51                  |
| Ligand/ions                                         | 72.98                  |
| Water                                               | 46.16                  |
| RMSD                                                |                        |
| Bond length (Å)                                     | 0.011                  |
| Bond angles (°)                                     | 1.05                   |
| PDB accession                                       | 6hsw                   |
